# Supplementary material for: Near-infrared light activatable niosomes loaded with indocyanine green and plasmonic gold nanorods for theranostic applications
Source: Royal Society of Chemistry journal article supplement (doi:10.1039/d3bm01187a), 2023-01-01
Supplement: d3bm01187a1.pdf [file d3bm01187a1.pdf]

## Supplementary Information

### Near Infrared Light Activatable Niosomes Loaded with Indocyanine Green and Plasmonic Gold Nanorods for Theranostic Applications

Yumnam Prince<sup>a†</sup>, Netra Hiremath<sup>b†</sup>, Raviraj Vankayala<sup>a,b</sup>

<sup>a</sup>Department of Biosciences and Bioengineering, Indian Institute of Technology Jodhpur, Karwar 342030, India

<sup>b</sup>Interdisciplinary research platform, Smart Health Care, Indian Institute of Technology Jodhpur, Karwar 342030, India

\*Email: rvankayala@iitj.ac.in

<sup>†</sup>Equally contributed

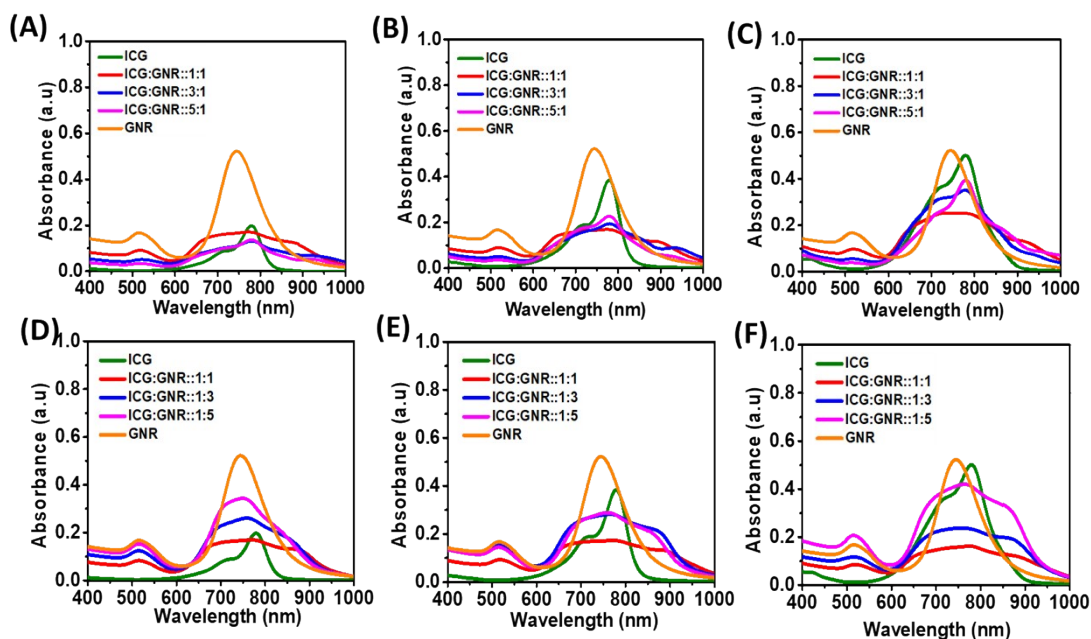

**Figure S1.** UV-Visible absorption spectra of (A, D) ICG (25 mM)/GNR(1.3 nM); (B, E) ICG (50 mM)/GNR(1.3 nM); (C, F) ICG (100 mM)/GNR(1.3 nM) respectively.

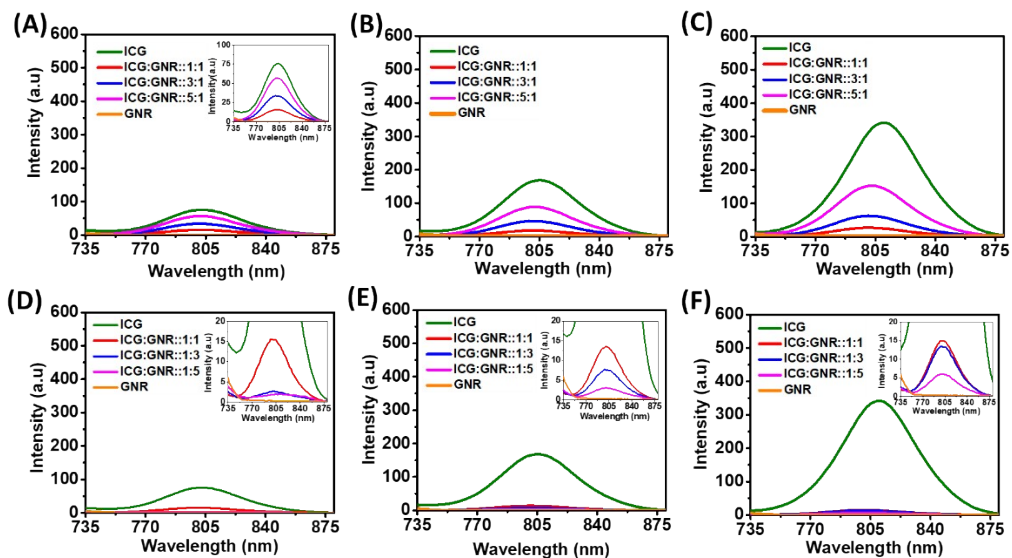

**Figure S2.** Fluorescence emission spectra of (A, D) ICG (25 mM)/GNR(1.3 nM); (B, E) ICG (50 mM)/GNR(1.3 nM); (C, F) ICG (100 mM)/GNR(1.3 nM). The excitation wavelength is 720 nm.

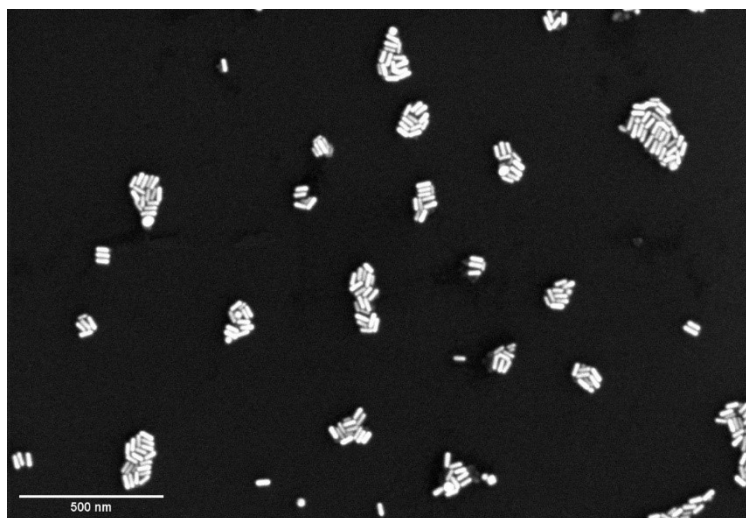

**Figure S3.** Scanning electron microscopy (SEM) image of plasmonic GNR.

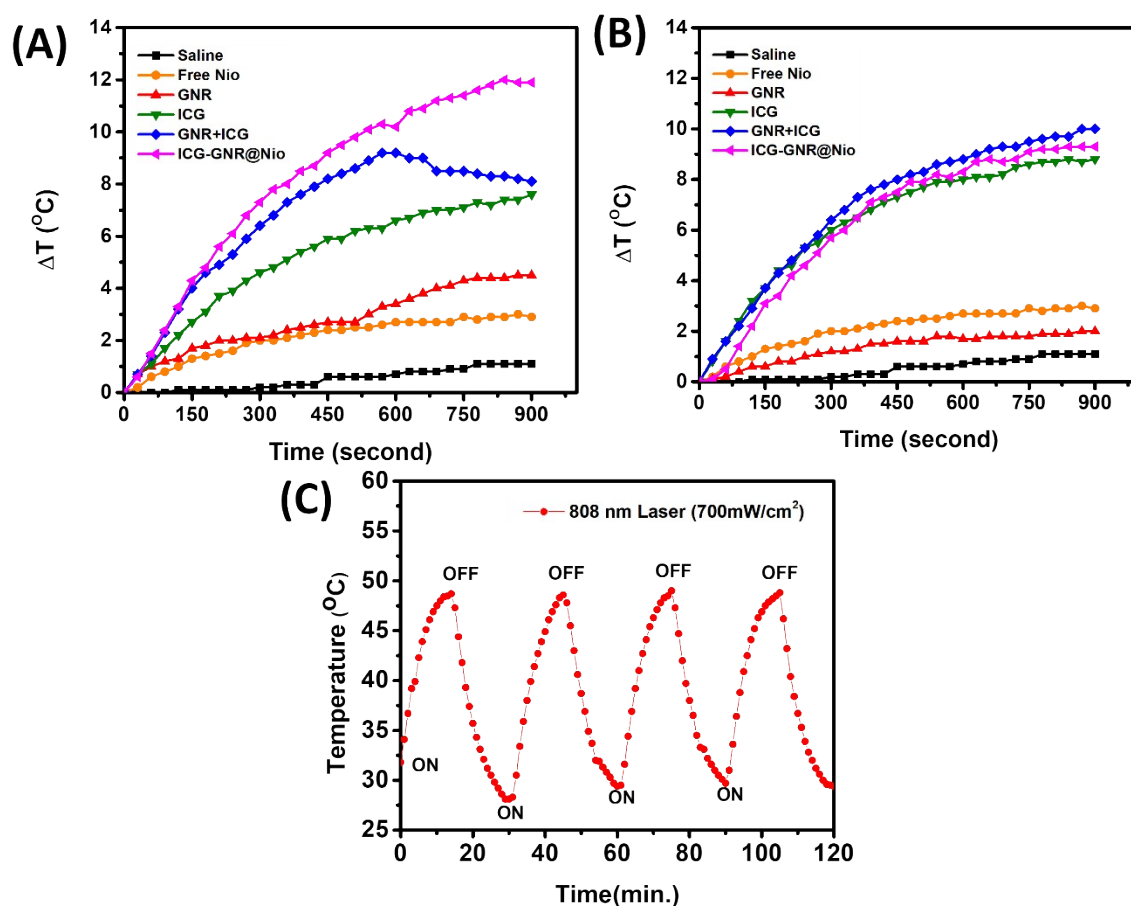

**Figure S4.** Photothermal temperature rise for ICG-GNR@Nio formulations. (A) exp. 1, (B) exp. 2, respectively and (C) Photostability of ICG-GNR@Nio for four ON-OFF cycles with 808 nm laser.

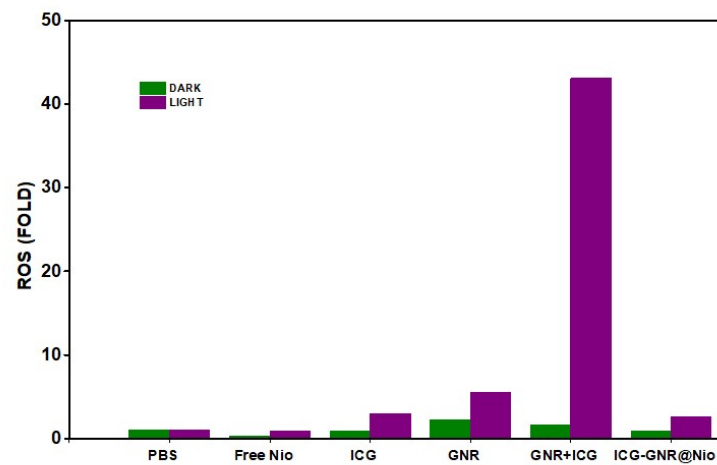

**Figure S5.** ROS generation with ICG-GNR under dark and photoirradiation conditions.

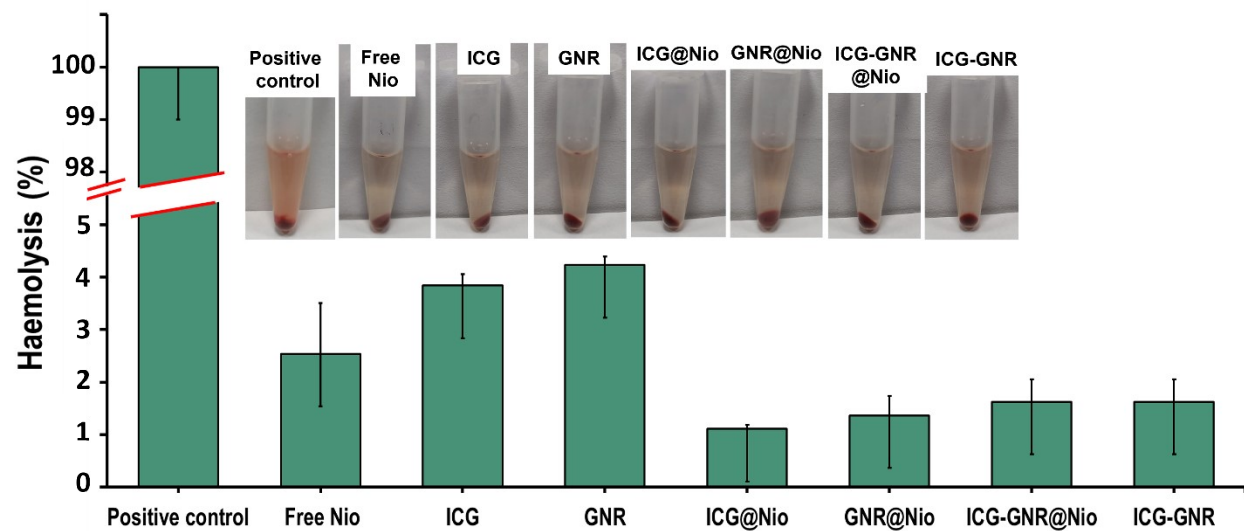

**Figure S6.** Hemolysis assay performed using various formulations, such as free Nio, ICG, GNR, ICG-GNR, ICG@Nio, GNR@Nio and ICG-GNR@Nio. The positive control used is nanopure water.

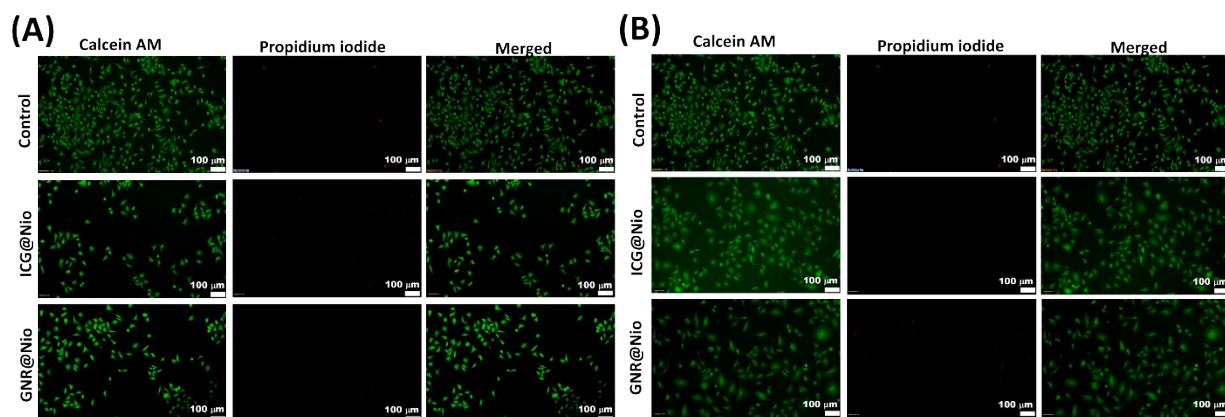

**Figure S7.** Fluorescence microscopy images of A549 cells treated with PBS, ICG@Nio and GNR@Nio, respectively under dark and photoirradiation conditions.

| <b>Formulation</b> | <b>Exp. 1</b> | <b>Exp. 2</b> | <b>Exp. 3</b> |
|--------------------|---------------|---------------|---------------|
| ICG@Nio            | 84%           | 68.6%         | 73.1%         |
| ICG-GNR@Nio        | 80%           | 83.4%         | 87.4%         |

**Table S1.** Encapsulation efficiencies of ICG in ICG@Nio and ICG-GNR@Nio for all the three different formulations.

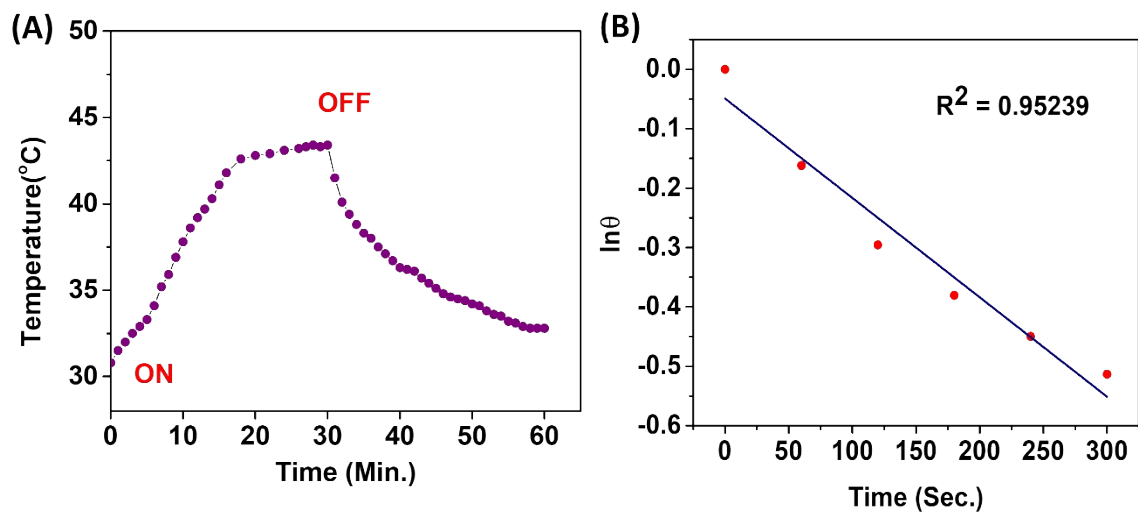

**Figure S8.** (a) Photothermal effect of the irradiation of the aqueous solution of the ICG-GNR@Nio Exp. 3 with the 1064 nm laser (30 min; 0.7 W/cm<sup>2</sup>). The laser was turned off after 30 min post irradiation. (b) Linear time data versus  $\ln(\theta)$  obtained from the cooling period of (a).



### Photothermal conversion efficiency of ICG-GNR@Nio:

The photothermal conversion efficiency of ICG-GNR@Nio (exp. 3) was calculated according to the previous method.<sup>S1</sup> The detailed calculation is as follows.

$$\eta = \frac{hs(T_{max} - T_0) - Q_{Dis}}{I(1 - 10^{-A_{1064}})} \quad (1)$$

Where  $h$  is the heat transfer coefficient,  $S$  is the surface area of the container, and the value of  $hS$  is obtained from the Eq.4 and Figure 8B. The maximum steady temperature ( $T_{max}$ ) of the solution of the ICG-GNR@Nio was 43.4°C and  $T_0$  was 30.7°C. The temperature change of the solution ( $T_{max} - T_0$ ) was 12.7°C. The laser power  $I$  was 0.7 W/cm<sup>2</sup>, the absorbance of ICG-GNR@Nio at 1064 nm ( $A_{1064}$ ) was 0.95.  $Q_{Dis}$  is the heat dissipated from the light absorbed by the solvent and container and was calculated to be 7.98 mW.

In order to gain  $hS$ , a dimensionless parameter  $\theta$  was introduced as follows;

$$\theta = \frac{(T_t - T_0)}{(T_{max} - T_0)} \quad (2)$$

A sample system time constant was calculated as equation 3

$$t = -\tau_s \ln(\theta) \quad (3)$$

According to Figure S8B,  $\tau_s$  was determined and calculated to be 533 s.

$$hs = \frac{m_p C_p}{\tau_s} \quad (4)$$

In addition,  $m$  is 0.3 g and  $C$  is 4.2 J/g·°C. Thus, according to Eq. 4,  $hS$  is deduced to be 3.93 mW/°C. Thus, substituting according values of each parameters to Eq. 1, the 1064 nm laser heat conversion efficiency ( $\eta$ ) of the ICG-GNR@Nio was calculated to be 67.52%.

### Supplementary References:

[S1]. X. Liu, B. Li, F. Fu, K. Xu, R. Zou, Q. Wang, B. Zhang, Z. Chen and J. Hu, *Dalt. Trans.*, 2014, **43**, 11709–11715.
